# Supplementary material for: Laryngeal Penetration and Risk of Aspiration Pneumonia in Children with Dysphagia—A Systematic Review
Source: MDPI journal article supplement (doi:10.3390/jcm12124087), 2023-06-16
Supplement: s1 [file s1]

**Table S1. Excluded studies and exclusion reasons**

| <b>Author</b>                          | <b>Year of Publication</b> | <b>Reason for Exclusion</b> |
|----------------------------------------|----------------------------|-----------------------------|
| Serel, S <sup>1</sup>                  | 2013                       | Lack of Outcomes            |
| Erdur, O <sup>2</sup>                  | 2017                       | No Comparison Group         |
| Kim, B.R <sup>3</sup>                  | 2010                       | Ineligible Study Design     |
| Levy, D.S <sup>4</sup>                 | 2019                       | Lack of Outcomes            |
| Rosen, R <sup>5</sup>                  | 2018                       | Lack of Outcomes            |
| Duncan, D <sup>6</sup>                 | 2018                       | No Comparison Group         |
| Kyoung-Moo, L. E. E <sup>7</sup>       | 2017                       | Lack of Outcomes            |
| Schwarz, S. M <sup>8</sup>             | 2001                       | Adult population            |
| Bock, J.M <sup>9</sup>                 | 2017                       | Adult Population            |
| Shin, J.C <sup>10</sup>                | 2011                       | Adult population            |
| Wong, N.S <sup>11</sup>                | 2019                       | Adult population            |
| Lagos-Guimarães, H. N. C <sup>12</sup> | 2016                       | Adult population            |
| Lefton-Greif, M. A <sup>13</sup>       | 2000                       | Adult population            |
| Alnassar, M <sup>14</sup>              | 2011                       | Ineligible Intervention     |
| Duncan, D.R <sup>15</sup>              | 2018                       | Ineligible Intervention     |
| Bowman, O. Jayne <sup>16</sup>         | 2020                       | Lack of Outcomes            |
| Osborn, A. J <sup>5</sup>              | 2014                       | Adult population            |
| Stanley, M. A <sup>16</sup>            | 2019                       | Adult population            |
| Teive, H. G. <sup>17</sup>             | 2014                       | Adult population            |
| Terré, R. <sup>16</sup>                | 2009                       | Adult population            |
| Schurr, M. J <sup>16</sup>             | 1999                       | Adult population            |
| Madhoun, L <sup>18</sup>               | 2018                       | Adult population            |
| Morgan, A <sup>16</sup>                | 2005                       | Adult population            |
| Birutis, R.I <sup>16</sup>             | 2013                       | Adult population            |

|                                            |      |                         |
|--------------------------------------------|------|-------------------------|
| Soria, F <sup>19</sup>                     | 2013 | Adult population        |
| Rosen, R <sup>20</sup>                     | 2018 | Duplicate Study         |
| Lee, J. H <sup>21</sup>                    | 2011 | Lack of Outcomes        |
| De Fatima Da Silva Munhoz, L <sup>22</sup> | 2015 | Lack of Outcomes        |
| Kyeong-Woo, Lee <sup>16</sup>              | 2011 | Lack of Outcomes        |
| Duncan, D <sup>23</sup>                    | 2017 | Lack of Outcomes        |
| Dharmarathna, I <sup>24</sup>              | 2021 | Lack of Outcomes        |
| Diniz, P <sup>25</sup>                     | 2015 | Duplicate Study         |
| Akel, K <sup>11</sup>                      | 2017 | Ineligible Study Design |
| Duncan, D. <sup>12</sup>                   | 2018 | Lack of Outcomes        |
| Dharmarathna, Isuru <sup>26</sup>          | 2021 | Ineligible Intervention |
| Diniz, P. B <sup>27</sup>                  | 2017 | Lack of Outcomes        |
| Levy, D. S <sup>28</sup>                   | 2018 | Lack of Outcomes        |
| Kyeong-Eun, U. H. M <sup>29</sup>          | 2013 | Lack of Outcomes        |
| Kaymaz, Nazan <sup>30</sup>                | 2017 | Ineligible Study Design |

**Table S2. ROBINS risk of bias assessment with explanations**

| Author                              | Year | Outcome Studied      | Overall Risk of Bias Assessment | Reason for Risk of Bias                                                                                                                                                                               |
|-------------------------------------|------|----------------------|---------------------------------|-------------------------------------------------------------------------------------------------------------------------------------------------------------------------------------------------------|
| Maireade E. McSweeney <sup>13</sup> | 2020 | Enteral Feeding      | High                            | (1) Did not account for all confounders (2) Did not account for time-varying confounders                                                                                                              |
| Pavithran, Jayanthi <sup>31</sup>   | 2019 | Aspiration Pneumonia | Moderate                        | Potential for confounding effects                                                                                                                                                                     |
| Kim, GE <sup>6</sup>                | 2018 | Aspiration Pneumonia | High                            | (1) Did not account for all confounders (2) Did not account for time-varying confounders                                                                                                              |
| Kim, Bo Ryun <sup>7</sup>           | 2014 | Enteral Feeding      | Moderate                        | Potential for confounding effects                                                                                                                                                                     |
| Gurberg, Joshua <sup>32</sup>       | 2015 | Aspiration Pneumonia | High                            | (1) Did not account for all confounders (2) Did not account for time-varying confounders (3) Outcome data unavailable for all participants (4) Participants excluded due to missing data for analysis |
| Kemps, Glen <sup>25</sup>           | 2015 | Aspiration Pneumonia | Moderate                        | (1) Potential for confounding effects (2) Participants excluded due to missing data for analysis                                                                                                      |

|                                        |      |                      |          |                                                                                                                                                                                                                                                                                                                                                 |
|----------------------------------------|------|----------------------|----------|-------------------------------------------------------------------------------------------------------------------------------------------------------------------------------------------------------------------------------------------------------------------------------------------------------------------------------------------------|
| Newman, Lisa A. <sup>26</sup>          | 2001 | Aspiration Pneumonia | High     | (1) Did not account for all confounders (2) Did not account for time-varying confounders (3) Intervention groups not clearly defined                                                                                                                                                                                                            |
| Lefton-Greif, Maureen A. <sup>27</sup> | 2006 | Aspiration Pneumonia | High     | (1) Did not account for all confounders (2) Did not account for time-varying confounders (3) Intervention groups not clearly defined (4) Participants excluded due to missing data for analysis (5) Reasons for missing data inconsistent among all interventions (6) Lack of evidence that results were robust to the presence of missing data |
| Lefton-Greif, Maureen A. <sup>28</sup> | 2006 | Enteral Feeding      | High     | (1) Did not account for all confounders (2) Did not account for time-varying confounders (3) Intervention groups not clearly defined (4) Participants excluded due to missing data for analysis (5) Reasons for missing data inconsistent among all interventions (6) Lack of evidence that results were robust to the presence of missing data |
| Weir, Kelly <sup>29</sup>              | 2011 | Aspiration Pneumonia | Moderate | Potential for confounding effects                                                                                                                                                                                                                                                                                                               |
| Weir, Kelly <sup>27</sup>              | 2011 | Enteral Feeding      | Moderate | Potential for confounding effects                                                                                                                                                                                                                                                                                                               |
| Taniguchi, M. H. <sup>30</sup>         | 1994 | Aspiration Pneumonia | Moderate | (1) Potential for confounding effects (2) Participants excluded due to missing data for analysis (3) Lack of evidence that results were robust to the presence of missing data                                                                                                                                                                  |
| Weir, Kelly <sup>13</sup>              | 2007 | Aspiration Pneumonia | Moderate | Potential for confounding effects                                                                                                                                                                                                                                                                                                               |

**Footnote:** Risk of bias was assessed according to Cochrane risk of bias tool for observational studies (ROBINS-1). We assessed the risk of bias from each study for a given outcome.

### Supplementary Table S3: GRADE evidence profile

**Question:** Laryngeal penetration compared to No laryngeal penetration in pediatric patients with dysphagia

**Setting:** mainly outpatient

| Certainty assessment        |                       |                      |               |              |                      |                      | № of patients         |                          | Effect                           | Certainty   |
|-----------------------------|-----------------------|----------------------|---------------|--------------|----------------------|----------------------|-----------------------|--------------------------|----------------------------------|-------------|
| № of studies                | Study design          | Risk of bias         | Inconsistency | Indirectness | Imprecision          | Other considerations | Laryngeal penetration | No laryngeal penetration | Relative (95% CI)                |             |
| <b>Aspiration Pneumonia</b> |                       |                      |               |              |                      |                      |                       |                          |                                  |             |
| 6                           | observational studies | serious <sup>a</sup> | not serious   | not serious  | serious <sup>b</sup> | none                 | 294                   | 251                      | <b>OR 1.44</b><br>(0.94 to 2.19) | ⊕⊕○○<br>Low |
| <b>Enteral Tube</b>         |                       |                      |               |              |                      |                      |                       |                          |                                  |             |
| 1                           | observational studies | serious <sup>b</sup> | not serious   | not serious  | serious <sup>b</sup> | none                 | 66                    | 46                       | <b>OR 0.77</b><br>(0.26 to 2.29) | ⊕⊕○○<br>Low |

**Abbreviations:** CI: confidence interval; OR: odds ratio

## Explanations

- a. Two of the included studies were at high risk of bias because they did not adjust for any confounders.  
b. The confidence interval around the summary estimate was wide and included null effects.

## Table S4. GRADE evidence profile

**Question:** Tracheal aspiration compared to No tracheal aspiration in pediatric patients with dysphagia

**Setting:** mainly outpatient

| Certainty assessment        |                       |                      |               |              |                      |                      | № of patients       |                        | Effect                              | Certainty        |
|-----------------------------|-----------------------|----------------------|---------------|--------------|----------------------|----------------------|---------------------|------------------------|-------------------------------------|------------------|
| № of studies                | Study design          | Risk of bias         | Inconsistency | Indirectness | Imprecision          | Other considerations | Tracheal Aspiration | No Tracheal Aspiration | Relative (95% CI)                   |                  |
| <b>Aspiration Pneumonia</b> |                       |                      |               |              |                      |                      |                     |                        |                                     |                  |
| 7                           | observational studies | serious <sup>a</sup> | not serious   | not serious  | not serious          | none                 | -/344               | -/453                  | <b>OR 2.72</b><br>(1.86 to 3.98)    | ⊕⊕⊕○<br>Moderate |
| <b>Enteral Tube</b>         |                       |                      |               |              |                      |                      |                     |                        |                                     |                  |
| 2                           | observational studies | serious              | not serious   | not serious  | serious <sup>b</sup> | none                 | -/139               | -/273                  | <b>OR 1.32</b><br>(0.58 to 2.98)    | ⊕⊕○○<br>Low      |
| <b>Hospitalization</b>      |                       |                      |               |              |                      |                      |                     |                        |                                     |                  |
| 1                           | observational studies | not serious          | not serious   | not serious  | not serious          | none                 | -/0                 | -/0                    | <b>RR 1.043</b><br>(1.010 to 1.070) | ⊕⊕⊕⊕<br>High     |

CI: confidence interval; OR: odds ratio; RR: risk ratio

## Explanations

- a. Two of the included studies were at high risk of bias because they did not adjust for any of the confounders.
- b. The confidence interval around the summary estimate was wide and included a null effect.

## References

1. Bhattacharyya N. The prevalence of pediatric voice and swallowing problems in the United States. *Laryngoscope* 2015; 125: 746-750. 2014/09/16. DOI: 10.1002/lary.24931.
2. Lawlor CM and Choi S. Diagnosis and Management of Pediatric Dysphagia: A Review. *JAMA Otolaryngol Head Neck Surg* 2020; 146: 183-191. DOI: 10.1001/jamaoto.2019.3622.
3. Covidence systematic review software, Veritas Health Innovation, Melbourne, Australia. Available at [www.covidence.org](http://www.covidence.org).
4. Durvasula VS, O'Neill AC and Richter GT. Oropharyngeal Dysphagia in children: mechanism, source, and management. *Otolaryngol Clin North Am* 2014; 47: 691-720. 2014/09/13. DOI: 10.1016/j.otc.2014.06.004.
5. Rosenbek JC, Robbins JA, Roecker EB, et al. A penetration-aspiration scale. *Dysphagia* 1996; 11: 93-98. 1996/01/01. DOI: 10.1007/BF00417897.
6. Taniguchi MH and Moyer RS. Assessment of risk factors for pneumonia in dysphagic children: significance of videofluoroscopic swallowing evaluation. *Dev Med Child Neurol* 1994; 36: 495-502. 1994/06/01. DOI: 10.1111/j.1469-8749.1994.tb11879.x.
7. Weir K, McMahon S, Barry L, et al. Oropharyngeal aspiration and pneumonia in children. *Pediatr Pulmonol* 2007; 42: 1024-1031. 2007/09/26. DOI: 10.1002/ppul.20687.
8. Delzell PB, Kraus RA, Gaisie G, et al. Laryngeal penetration: a predictor of aspiration in infants? *Pediatr Radiol* 1999; 29: 762-765. 1999/10/20. DOI: 10.1007/s002470050690.
9. Friedman B and Frazier JB. Deep laryngeal penetration as a predictor of aspiration. *Dysphagia* 2000; 15: 153-158. 2000/06/06. DOI: 10.1007/s004550010018.
10. Serel Arslan S, Demir N and Karaduman AA. Both pharyngeal and esophageal phases of swallowing are associated with recurrent pneumonia in pediatric patients. *Clin Respir J* 2018; 12: 767-771. 2016/12/08. DOI: 10.1111/crj.12592.
11. Gurberg J, Birnbaum R and Daniel SJ. Laryngeal penetration on videofluoroscopic swallowing study is associated with increased pneumonia in children. *Int J Pediatr Otorhinolaryngol* 2015; 79: 1827-1830. 2015/09/19. DOI: 10.1016/j.ijporl.2015.08.016.
12. Kemps G, Sewitch M, Birnbaum R, et al. Contrast pooling in videofluoroscopic swallowing study as a risk factor for pneumonia in children with dysphagia. *Int J Pediatr Otorhinolaryngol* 2015; 79: 1306-1309. 2015/06/21. DOI: 10.1016/j.ijporl.2015.05.039.
13. Newman LA, Keckley C, Petersen MC, et al. Swallowing function and medical diagnoses in infants suspected of Dysphagia. *Pediatrics* 2001; 108: E106. 2001/12/04. DOI: 10.1542/peds.108.6.e106.
14. Duncan DR, Amirault J, Mitchell PD, et al. Oropharyngeal Dysphagia Is Strongly Correlated With Apparent Life-Threatening Events. *J Pediatr Gastroenterol Nutr* 2017; 65: 168-172. 2016/10/16. DOI: 10.1097/MPG.0000000000001439.
15. Page MJ, McKenzie JE, Bossuyt PM, et al. The PRISMA 2020 statement: an updated guideline for reporting systematic reviews. *BMJ* 2021; 372: n71. 2021/03/31. DOI: 10.1136/bmj.n71.

16. Adlakha V, Ramos L, Smith A, et al. Risk of aspiration pneumonia in paediatric patients with dysphagia who were found to have laryngeal penetration on the instrumental swallow evaluation: a systematic review protocol. *BMJ Open* 2021; 11: e048422. 2021/08/05. DOI: 10.1136/bmjopen-2020-048422.
17. WHO classification and treatment of pneumonia in children at health facilities: evidence summaries. [Internet]. 2014 [cited 2020 Dec 21]. Available from: .
18. Covidence systematic review software VHI, Melbourne, Australia. Available at [www.covidence.org](http://www.covidence.org).
19. Sterne JA, Hernan MA, Reeves BC, et al. ROBINS-I: a tool for assessing risk of bias in non-randomised studies of interventions. *BMJ* 2016; 355: i4919. 2016/10/14. DOI: 10.1136/bmj.i4919.
20. Review Manager (RevMan) [Computer program]. Version 5.3. Copenhagen: The Nordic Cochrane Centre TCC, 2014. .
21. Higgins JPT TJ, Chandler J, Cumpston M, Li T, Page MJ, Welch VA (editors). Cochrane Handbook for Systematic Reviews of Interventions version 6.1. *Cochrane* 2020.
22. Melsen WG, Bootsma MC, Rovers MM, et al. The effects of clinical and statistical heterogeneity on the predictive values of results from meta-analyses. *Clin Microbiol Infect* 2014; 20: 123-129. 2013/12/11. DOI: 10.1111/1469-0691.12494.
23. Guyatt G, Oxman AD, Akl EA, et al. GRADE guidelines: 1. Introduction-GRADE evidence profiles and summary of findings tables. *J Clin Epidemiol* 2011; 64: 383-394. 2011/01/05. DOI: 10.1016/j.jclinepi.2010.04.026.
24. GRADEpro. GRADEpro Guideline Development Tool [Software]. McMaster University and Evidence Prime, Available from [grade.pro](http://grade.pro), (2022).
25. Coon ER, Srivastava R, Stoddard GJ, et al. Infant Videofluoroscopic Swallow Study Testing, Swallowing Interventions, and Future Acute Respiratory Illness. *Hosp Pediatr* 2016; 6: 707-713. DOI: 10.1542/hpeds.2016-0049.
26. Kim BR, Sung IY, Choi KH, et al. Long-term outcomes in children with swallowing dysfunction. *Dev Neurorehabil* 2014; 17: 298-305. 20130719. DOI: 10.3109/17518423.2013.770102.
27. Kim GE, Sung IY, Ko EJ, et al. Comparison of Videofluoroscopic Swallowing Study and Radionuclide Salivagram for Aspiration Pneumonia in Children With Swallowing Difficulty. *Ann Rehabil Med* 2018; 42: 52-58. 20180228. DOI: 10.5535/arm.2018.42.1.52.
28. Lefton-Greif MA, Carroll JL and Loughlin GM. Long-term follow-up of oropharyngeal dysphagia in children without apparent risk factors. *Pediatr Pulmonol* 2006; 41: 1040-1048. DOI: 10.1002/ppul.20488.
29. McSweeney ME, Meleedy-Rey P, Kerr J, et al. A Quality Improvement Initiative to Reduce Gastrostomy Tube Placement in Aspirating Patients. *Pediatrics* 2020; 145. DOI: 10.1542/peds.2019-0325.
30. Miranda PP, Levy DS and Kieling RR. Aspiration in the First Year of Life and Later Tube Feeding: A Retrospective Cohort from a Low-Income Country. *Dysphagia* 2022 20220427. DOI: 10.1007/s00455-022-10450-4.
31. Pavithran J, Puthiyottil IV, Narayan M, et al. Observations from a pediatric dysphagia clinic: Characteristics of children at risk of aspiration pneumonia. *Laryngoscope* 2019; 129: 2614-2618. 20181224. DOI: 10.1002/lary.27654.
32. Weir KA, McMahon S, Taylor S, et al. Oropharyngeal aspiration and silent aspiration in children. *Chest* 2011; 140: 589-597. 20110324. DOI: 10.1378/chest.10-1618.
